# Supplementary material for: ARS2/MAGL signaling in glioblastoma stem cells promotes self-renewal and M2-like polarization of tumor-associated macrophages
Source: PubMed Central journal article supplement (PMC7293269; doi:10.1038/s41467-020-16789-2), 2020-06-12
Supplement: 41467_2020_16789_MOESM1_ESM.pdf [file 41467_2020_16789_MOESM1_ESM.pdf]

1 **SUPPLEMENTARY INFORMATON**

2 ARS2/MAGL signaling in glioblastoma stem cells promotes self-renewal and  
3 M2-like polarization of tumor-associated macrophages

4 Yin et al.

5 Contents

6 Supplementary Figures 1-8

7 Supplementary Tables 1-3

8

1 **SUPPLEMENTARY FIGURES 1-7**

2 **Supplementary Figure 1**

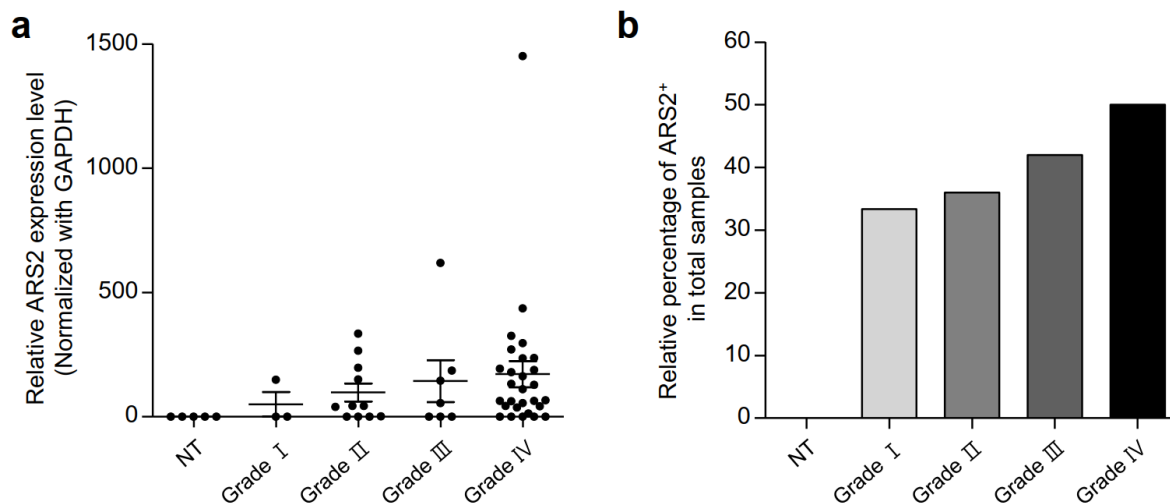

3

4 **Supplementary Figure 1. Comparison of ARS2 expression level according to brain**

5 **tumor grade. a,** The dot plot of relative ARS2 expression level according to brain tumor

6 grade in patient tissues from National Cancer Center (NCC), Republic of Korea. Expression

7 level normalized by loading control GAPDH. (n; NT=5, Grade I=3, II=11, III=6, IV=26). All

8 error bars represent mean  $\pm$  standard error of the mean (SEM). **b,** The bar graph of ARS2

9 positive percentage according to brain tumor grade in patient tissues from NCC. The index

10 score of y-axis are counted as percentages compared to total samples.

11

1 **Supplementary Figure 2**

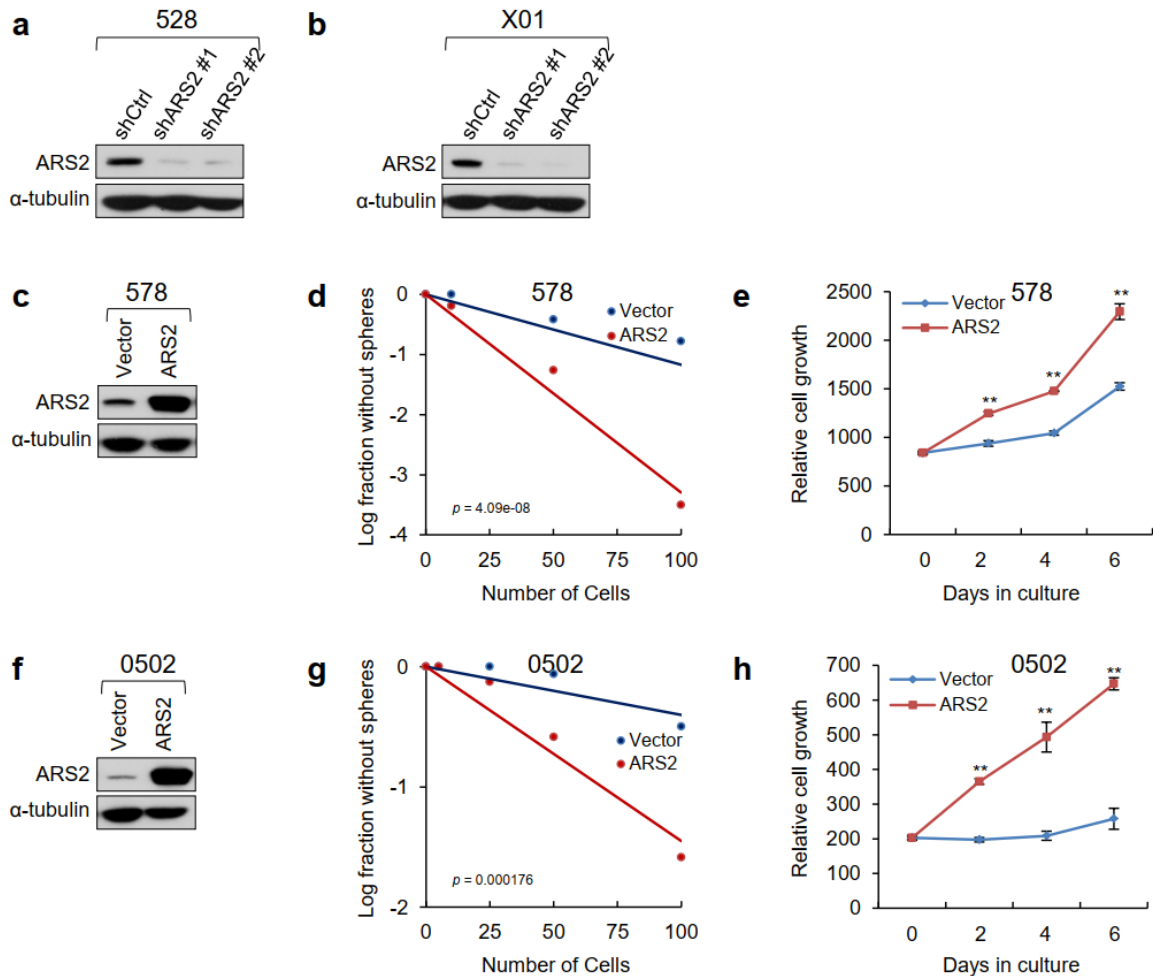

2

3 **Supplementary Figure 2. Overexpression of ARS2 Promotes GSCs Self-renewal. a,b,**

4 Immunoblot (IB) analysis of ARS2 in GSCs (528 cells and X01 cells) infected with a

5 shARS2-expressing lentiviral or shCtrl construct.  $\alpha$ -tubulin was used as a loading control. **c,**

6 IB analysis of ARS2 in GSCs (578 cells) infected with an ARS2-expressing lentiviral or

7 vector construct.  $\alpha$ -tubulin was used as a loading control. **d,** Limiting Dilution Assays

8 (LDAs), performed in 578-Vector and 578- ARS2 cells. (n = 24, *t*-test). **e,** Cell proliferation

9 assays performed using 578-Vector and 578- ARS2 cells. All error bars represent mean  $\pm$

10 SEM (n=3). \*\*  $P < 0.01$ . **f,** IB analysis of ARS2 in GSCs (0502 cells) infected with an ARS2-

11 expressing lentiviral or vector construct.  $\alpha$ -tubulin was used as a loading control. **g,** LDAs,

12 performed in 0502-Vector and 0502- ARS2 cells. (n = 24, *t*-test). **h,** Cell proliferation assays

13 performed using 0502-Vector and 0502-ARS2 cells. All error bars represent mean  $\pm$  SEM

14 (n=3). \*\*  $P < 0.01$ .

1 **Supplementary Figure 3**

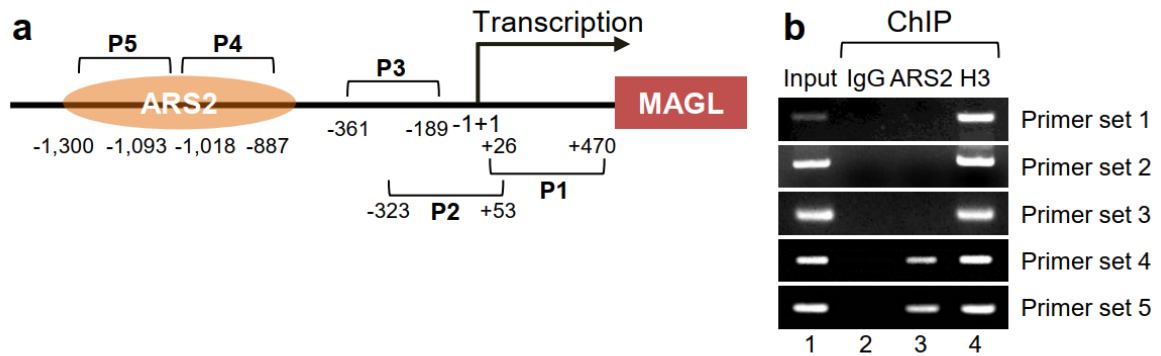

2  
3 **Supplementary Figure 3. ARS2 Directly Binding to MAGL Promoter.** **a**, Schematic  
4 primer design for Chromatin immunoprecipitation (ChIP) analysis in MAGL promoter. **b**,  
5 Immunoprecipitated chromatin was analyzed by PCR using primer specific for the promoter  
6 region of the MAGL gene. An antibody against IgG was used as a nonspecific control and  
7 histone H3 antibody as positive ChIP grade control.

8

1 **Supplementary Figure 4**

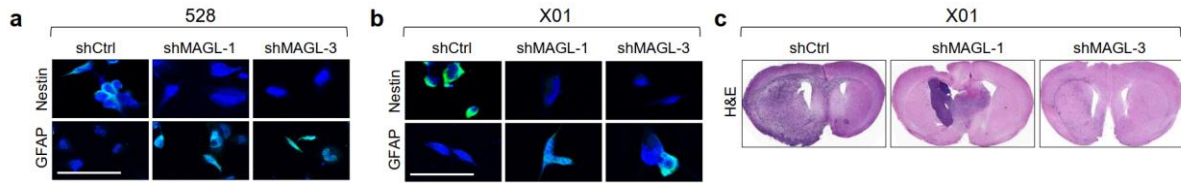

2

3 **Supplementary Figure 4. MAGL Regulates GSCs Stemness.** **a,b**, Representative  
4 immunocytochemistry (ICC) images of Nestin and GFAP in GSCs (528 cells and X01 cells)  
5 infected with a shMAGL-expressing lentiviral or shCtrl construct. Nuclei were  
6 counterstained with DAPI (blue). Scale bar, 50  $\mu$ m. **c**, H&E staining of the whole brain in the  
7 orthotopic xenograft mouse model of GSCs (X01 cells) infected with a shMAGL-expressing  
8 lentiviral or shCtrl construct. The sample is extracted at 39 days after cell injection. Scale bar,  
9 50  $\mu$ m.

10

# 1 Supplementary Figure 5

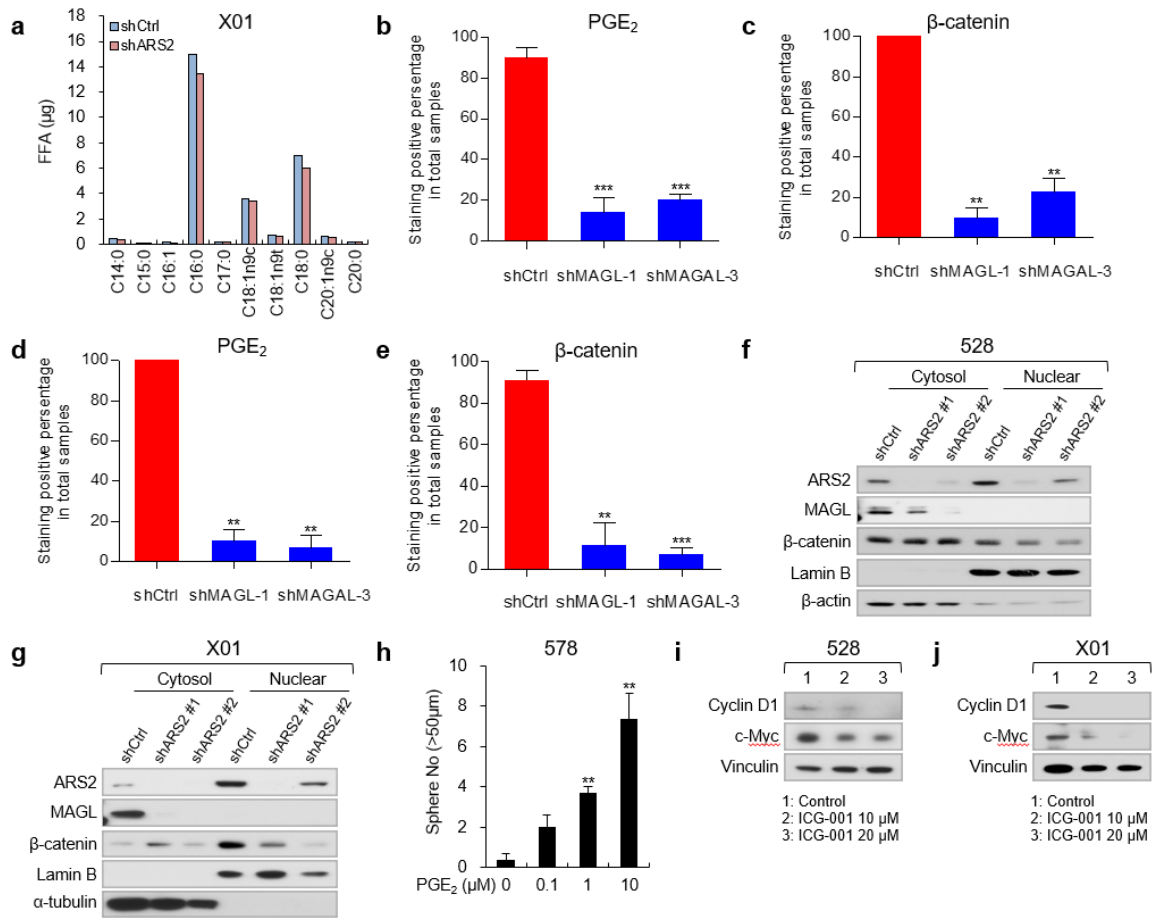

2

3 **Supplementary Figure 5. MAGL Regulates Stemness of GSCs by PGE<sub>2</sub>.** **a**, Fatty Acid  
 4 analysis performed using GSCs (X01 cells) infected with a shARS2-expressing lentiviral or  
 5 shCtrl construct. (n = 2). **b,c**, The graph shows the average positive cells percentage of ICC  
 6 analysis of PGE<sub>2</sub> and β-catenin in 528 cell infected with a shMAGL-expressing lentiviral or  
 7 shCtrl construct. All error bars represent mean ± SEM (n=3). (\*\* *P* < 0.01, \*\*\* *P* < 0.001, *t*-  
 8 test). **d,e**, The graph shows the average positive cells percentage of ICC analysis of PGE<sub>2</sub> and  
 9 β-catenin in X01 cell infected with a shMAGL-expressing lentiviral or shCtrl construct. All  
 10 error bars represent mean ± SEM (n=3). (\*\* *P* < 0.01, \*\*\* *P* < 0.001, *t*-test). **f,g**, Immunoblot  
 11 (IB) analysis of ARS2, MAGL and β-catenin in fractionated nuclear or cytosolic lysates from  
 12 528 cells and X01 cells infected with a shARS2-expressing lentiviral or shCtrl construct.  
 13 Lamin B and β-actin were used as markers for nucleus and cytoplasm, respectively. **h**, Sphere  
 14 formation assay performed using GSCs (578 cells) treated with different concentrations of  
 15 PGE<sub>2</sub> (0.1, 1, 10µM) or control. The graph shows the average number of spheres greater than

1 50  $\mu\text{m}$  in diameter. All error bars represent mean  $\pm$  SEM (n=3). ( \*\*  $P < 0.01$ ,  $t$ -test). **i,j**, IB  
2 analysis of Cyclin D1 and c-Myc in GSCs (528 and X01 cells) treated with different  
3 concentrations of ICG-001 (10, 20 $\mu\text{M}$ ) or control. Vinculin was used as a loading control.  
4

# 1 Supplementary Figure 6

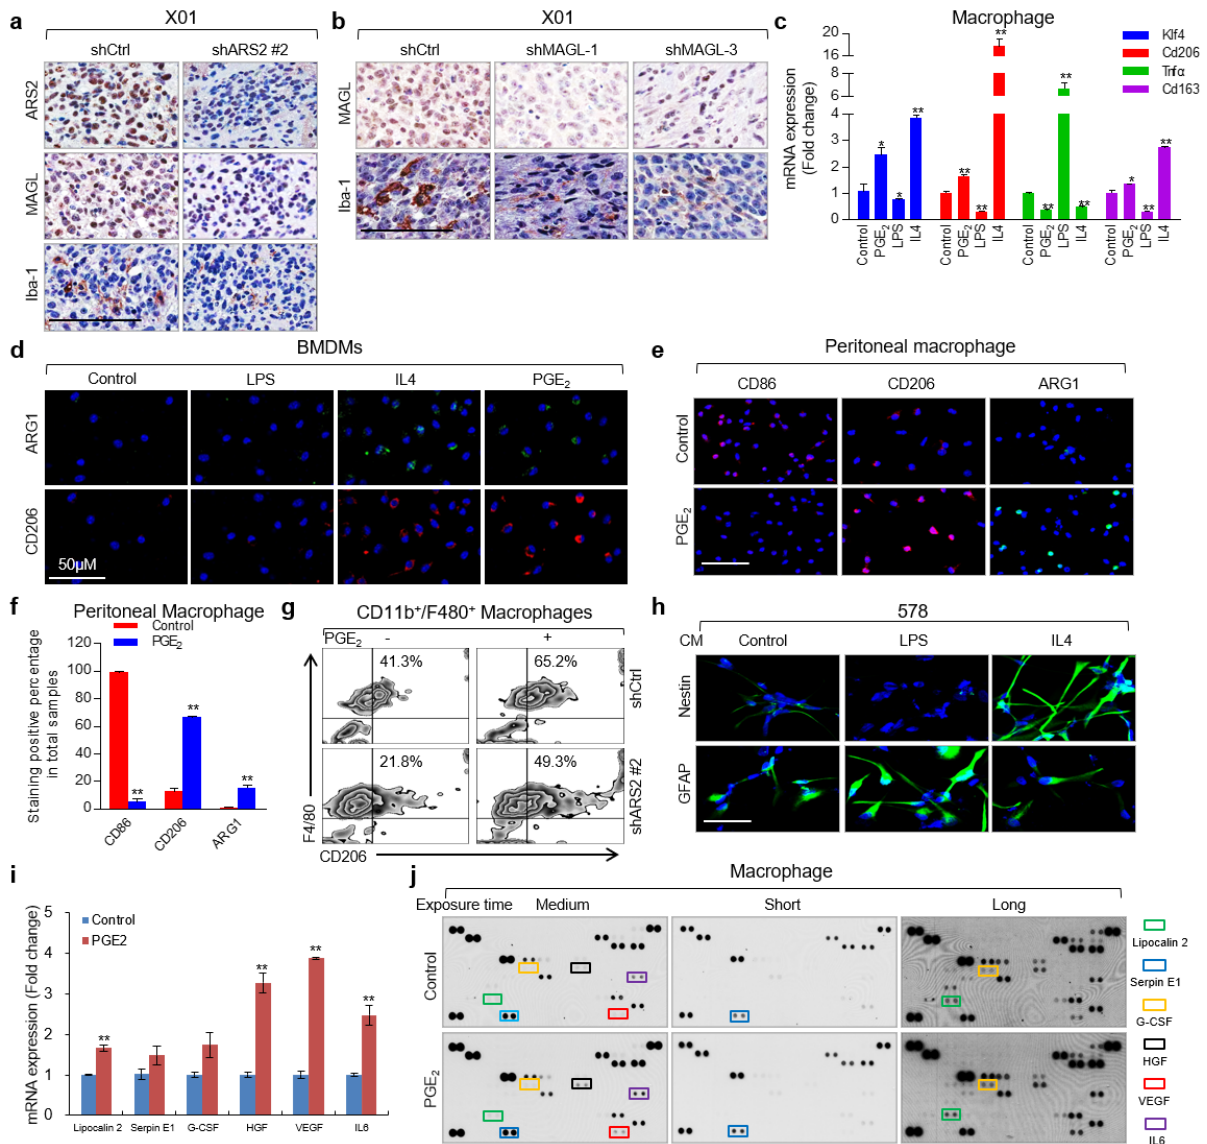

2

3 **Supplementary Figure 6. ARS2/MAGL Expression Correlates with TAM Density.** **a**,  
 4 Representative immunohistochemistry (IHC) images of ARS2, MAGL, and Iba-1 in the  
 5 orthotopic xenograft mouse model of GSCs (X01 cells) infected with a shARS2-expressing  
 6 lentiviral or shCtrl construct. Scale bar, 100 μm. **b**, Representative IHC images of MAGL and  
 7 Iba-1 in the orthotopic xenograft mouse model of GSCs (X01 cells) infected with a  
 8 shMAGL-expressing lentiviral or shCtrl construct. Scale bar, 100 μm. **c**, qRT-PCR analysis  
 9 of Klf4, Cd206, Tnfα, and Cd163 in peritoneal mouse macrophages after induction with  
 10 PGE<sub>2</sub> (10 μM), LPS or IL4, or treatment with control. All error bars represent mean ± SEM  
 11 (n=3). (\* *P* < 0.05, \*\* *P* < 0.01, *t*-test). **d**, Representative ICC images of ARG1 and CD206 in  
 12 bone marrow derived-macrophages (BMDMs) after treatment with LPS, IL-4, PGE<sub>2</sub> (10 μM),



1 or control. Nuclei were counterstained with DAPI (blue). Scale bar, 50  $\mu\text{m}$ . **e, f,**  
2 Representative ICC images (e) and corresponding quantification (f) of CD86, CD206, and  
3 ARG1 in peritoneal mouse macrophages after treatment with PGE<sub>2</sub> (10  $\mu\text{M}$ ) or control. Scale  
4 bar, 50  $\mu\text{m}$ . All error bars represent mean  $\pm$  SEM (n=3). (\*\* P < 0.01, *t*-test). **g,** Expression of  
5 CD206 in macrophages treated with PGE<sub>2</sub> or vehicle control for 24hrs by flow cytometry.  
6 CD11b and F4/80 was co-stained for macrophagic population verification. **h,** Representative  
7 ICC images of Nestin and GFAP in GSCs (578 cells) cultured in conditioned media (CM)  
8 from peritoneal mouse macrophages after induction with LPS or IL4, or treatment with  
9 control. Nuclei were counterstained with DAPI (blue). Scale bar, 50  $\mu\text{m}$ . **i,** qRT-PCR analysis  
10 of Lipocalin 2, Serpin E1, G-CSF, HGF, VEGF and IL6 in peritoneal mouse macrophages  
11 after induction with PGE<sub>2</sub> (10  $\mu\text{M}$ ). All error bars represent mean  $\pm$  SEM (n=3). (\*\* P < 0.01,  
12 *t*-test). **j,** Cytokine array performed using peritoneal mouse macrophages after induction with  
13 PGE<sub>2</sub> (10  $\mu\text{M}$ ).

14

# 1 Supplementary Figure 7

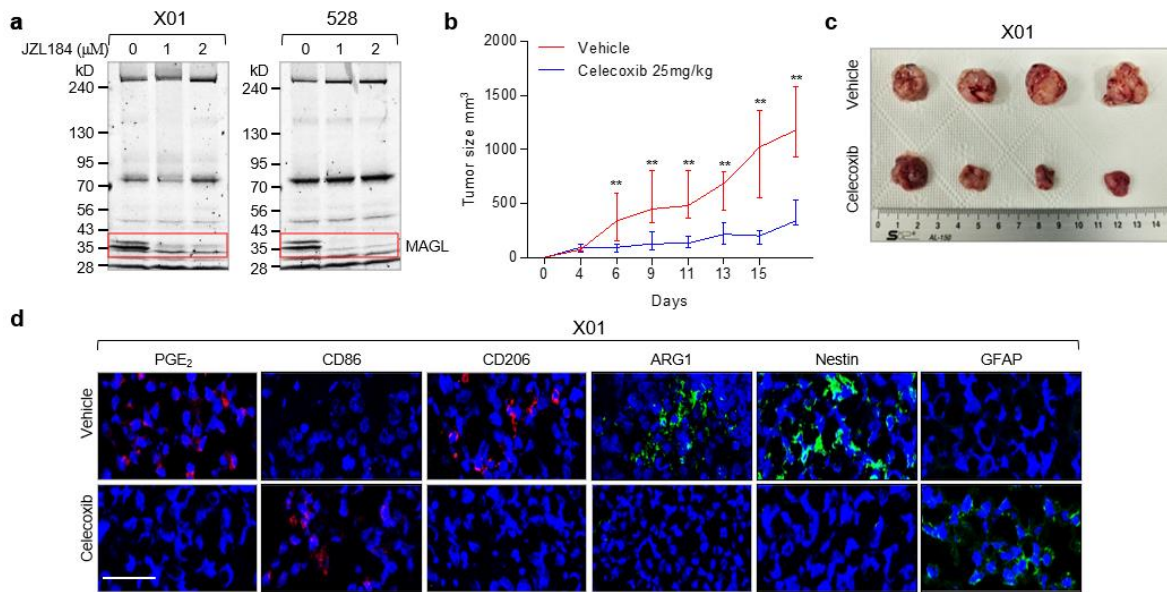

2

3 **Supplementary Figure 7. Celecoxib inhibits GSC self-renewal and tumorigenicity. a,**  
4 **Immunoblot (IB) analysis of MAGL hydrolase activity in GSCs (X01, 528 cells) treated with**  
5 **JZL184 (0, 1, 2  $\mu$ M). **b, Comparative analysis of subcutaneous tumor size of mice implanted**  
6 **with X01 treated with Celecoxib 25mg/kg or vehicle. All error bars in the graph represent**  
7 **mean  $\pm$  SD. (n=4,  $3 \times 10^6$  cells injected per mouse). \*\*  $P < 0.01$ ,  $t$ -test. **c, Images of tumor**  
8 **tissues from mice treated with vehicle or celecoxib. **d, Representative IF images of PGE<sub>2</sub>,**  
9 **CD86, CD206, ARG1, Nestin and GFAP in a celecoxib-treated subcutaneous mouse model.**  
10 **Sale bar, 50 $\mu$ M.********

11

# 1 Supplementary Figure 8

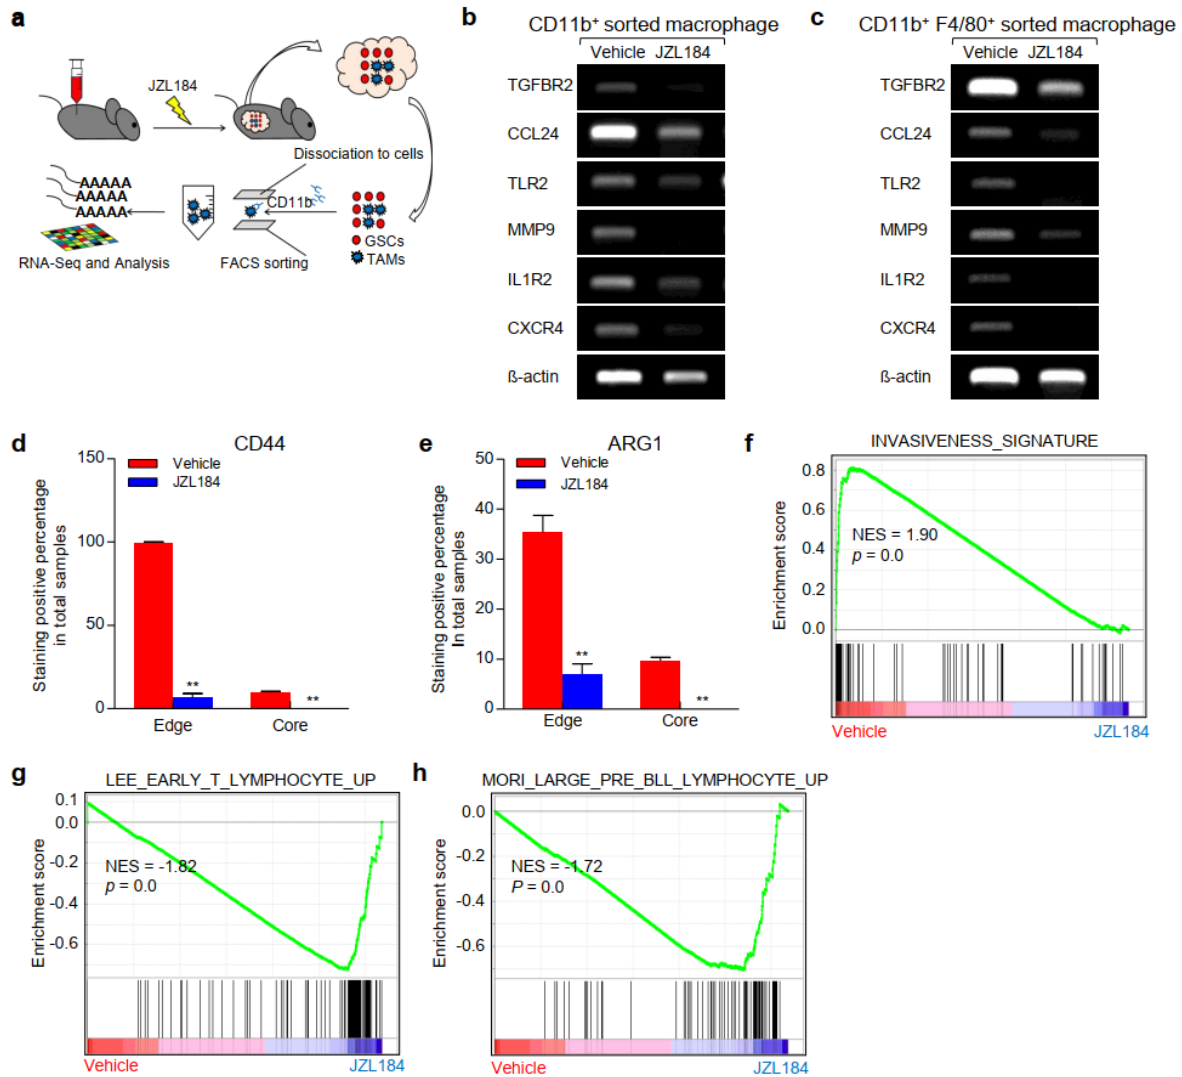

2

3 **Supplementary Figure 8. JZL184 downregulates M2-like TAM markers expression. a,**  
 4 Schematic representation of the fluorescence-activated cell sorting (FACS) of CD11b<sup>+</sup>  
 5 macrophages from the subcutaneous mouse models of GSC X01. **b,c,** RT-PCR analysis of  
 6 M2-like TAMs markers in CD11b<sup>+</sup> (b) and CD11b<sup>+</sup>/F4/80<sup>+</sup> (c) sorted macrophages treated  
 7 with JZL184 or vehicle. β-actin was used as a loading control. **d,e,** The graph shows the  
 8 staining positive percentage of IHC and IF analysis of CD44 (d), ARG1 (e) at region of tumor  
 9 edge or core of brain slices treated with JZL184 or vehicle. All error bars represent mean ±  
 10 SEM (n=3). (n = 3, \*\* P < 0.01, t-test). **f** Gene set enrichment assay (GSEA) plot for  
 11 invasiveness gene signature in comparison of TAMs from vehicle- vs. JZL184-treated  
 12 subcutaneous mouse model. **g,h,** GSEA plot for two types of lymphocyte gene signature in  
 13 comparison of TAMs from vehicle- vs. JZL184-treated subcutaneous mouse model.

1 **SUPPLEMENTARY TABLES 1-3**

2 Supplementary Table 1. Oligonucleotides used in PCR-based cloning of various plasmid  
3 constructs.

4 \* S, sense; A, antisense

| Plasmid constructs | Sequence of oligonucleotides                                                                                           |
|--------------------|------------------------------------------------------------------------------------------------------------------------|
| pcDNA3-ARS2-FLAG   | S: 5'- CGG GAT CCG CCA CCA TGG GTG ACA GTG ATG ACG -3'<br>A: 5'- GCT CTA GAA AGA AAT CAA CAT CGT CTG GG -3'            |
| pLenti6-ARS2-FLAG  | S: 5'- AGT GTG GTG GAA TTC GGA TCC GCC ACC ATG GG -3'<br>A: 5'- CCC TCT AGA CTC GAG GGC CCT ACT TGT CAT CGT CG -<br>3' |
| pLenti6-MAGL       | S: 5'- CGG GAT CCG CCA CCA TGC CAG AGG AAA GTT CCC -3'<br>A: 5'- GGA ATT CAC CGG CCA ATG CAT TCA G -3'                 |
| pGreen-MAGL-pro.   | S: 5'- TTT TAT CGA TGA ATT CCG GTG CAC TTA GCA TGT C -3'<br>A: 5'- TAC ACG CCT AAC TAG TCA TCG GAA ATG CCG CTG G-3'    |

5

6

1 Supplementary Table 2. Oligonucleotides used in shRNA expressing lentivirus constructs.

2 \* S, sense; A, antisense

| Plasmid constructs       | Sequence of oligonucleotides                                                                                                                                                               |
|--------------------------|--------------------------------------------------------------------------------------------------------------------------------------------------------------------------------------------|
| pLKO.1puro-shARS2-<br>#1 | S: 5'- CCG GGC TGA GAA TGA CAG TTC TAA TCT CGA GAT TAG<br>AAC TGT CAT TCT CAG CTT TTT G -3'<br>A: 5'- AAT TCA AAA AGC TGA GAA TGA CAG TTC TAA TCT CGA<br>GAT TAG AAC TGT CAT TCT CAG C -3' |
| pLKO.1puro-shARS2-<br>#2 | S: 5'- CCG GGC CAT TGT CAA GAT GCT GGA TCT CGA GAT CCA<br>GCA TCT TGA CAA TGG CTT TTT G -3'<br>A: 5'- AAT TCA AAA AGC CAT TGT CAA GAT GCT GGA TCT CGA<br>GAT CCA GCA TCT TGA CAA TGG-3'    |
| pLKO.1puro-shMGLL-<br>#1 | S: 5'- CCG GCA ACT CCG TCT TCC ATG AAA TCT CGAGAT TTC<br>ATG GAA GAC GGA GTT GTT TTT G-3'<br>A: 5'- AAT TCA AAA ACA ACT CCG TCT TCC ATG AAA TCT CGA<br>GAT TTC ATG GAA GAC GGA GTT G -3'   |
| pLKO.1puro-shMGLL-<br>#2 | S: 5'- CCG GCC AGG ACA AGA CTC TCA AGA TCT CGA GAT CTT<br>GAG AGT CTT GTC CTG GTT TTT G-3'<br>A: 5'- AAT TCA AAA ACC AGG ACA AGA CTC TCA AGA TCT CGA<br>GAT CTT GAG AGT CTT GTC CTG G -3'  |

3

4

1 Supplementary Table 3. Oligonucleotides used in ChIP and semi-quantitative PCR analysis.

2 \* S, sense; A, antisense

| Genes        | Sequence of oligonucleotides                                                   |
|--------------|--------------------------------------------------------------------------------|
| Primer set 1 | S: 5'- CCGGCCCAGGGATAAAGTGG -3'<br>A: 5'- TCGGAAATGCCGCTGGGAAA -3'             |
| Primer set 2 | S: 5'-TACACGTGTGGTGAGTGTGC-3'<br>A: 5'-CTGCGCCGCCACTTTATC-3'                   |
| Primer set 3 | S: 5'-CCTGCGTGCAGTGTAGTGAC-3'<br>A: 5'-GAACTGAGCTGGGTTCATGG-3'                 |
| Primer set 4 | S: 5'- AGC GGA GGA GCT AAT GTT CA -3'<br>A: 5'- GCT GTG ACC CCC AGA TAA AA -3' |
| Primer set 5 | S: 5'- CAG TGG GTA AGT CAC GCT CA -3'<br>A: 5'- CCA GTG GAG TGT CCC TGT CT -3' |

3

4

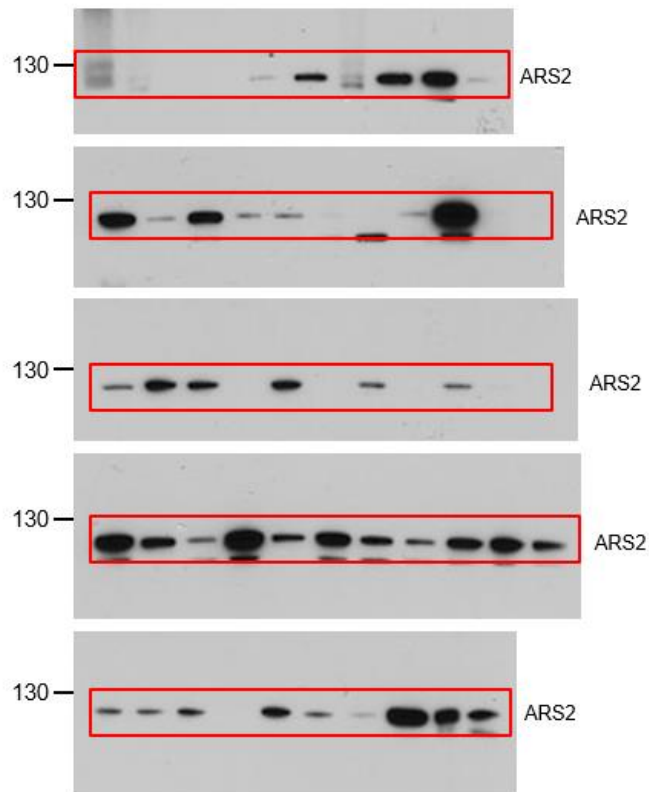

1

2 **Original immunoblot for Fig. 1f.**

3

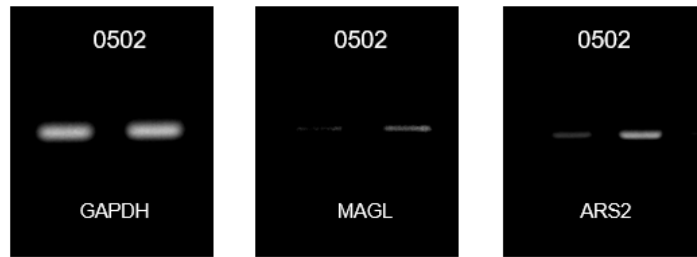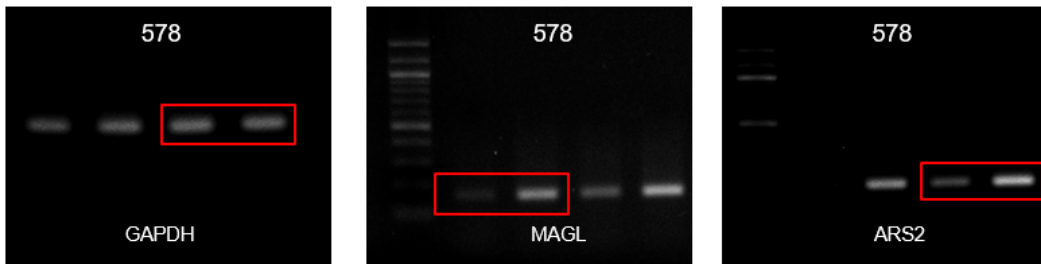

1  
2 Original RT-PCR for Fig. 3b,c.

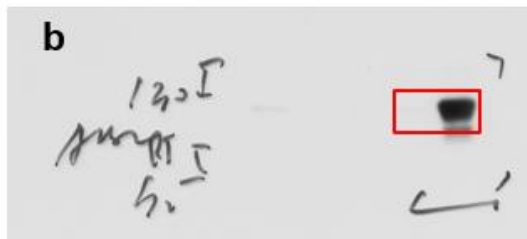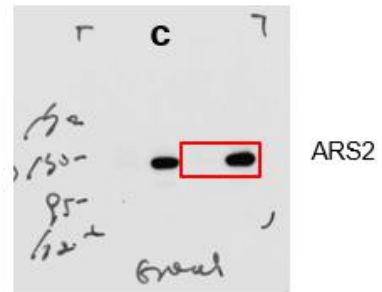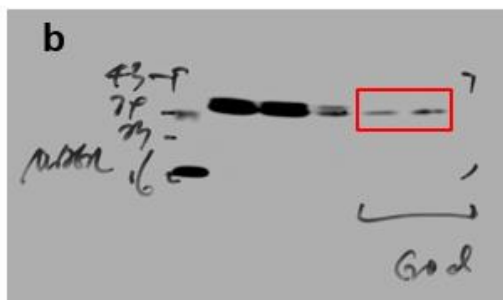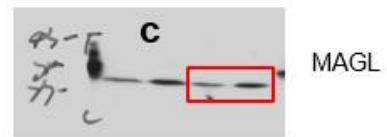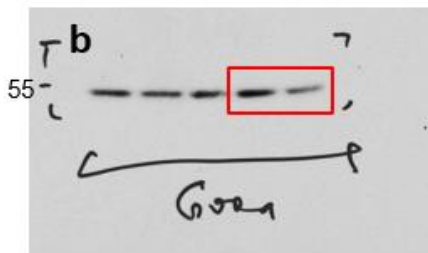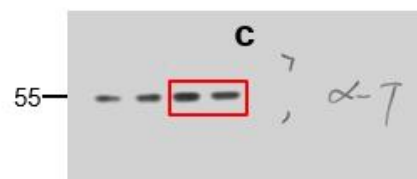

3  
4 Original immunoblot for Fig. 3b,c.



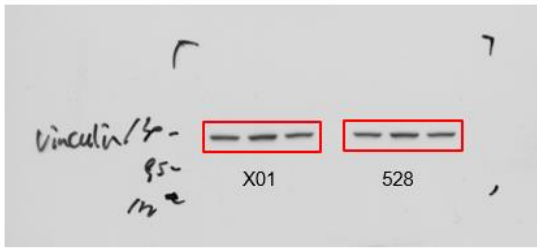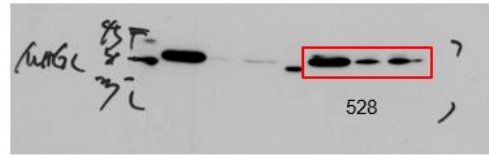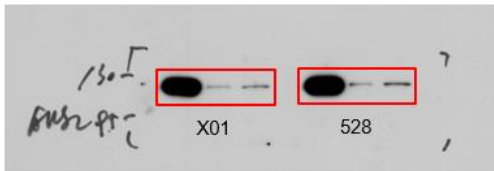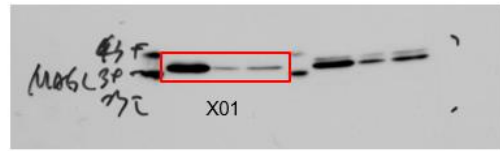

1  
2

Original immunoblot for Fig. 3d,e.

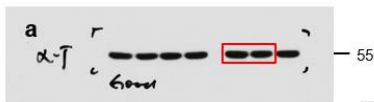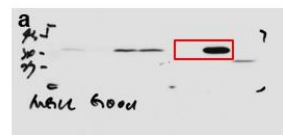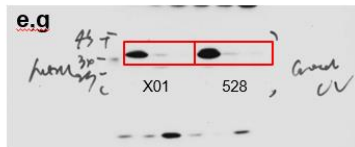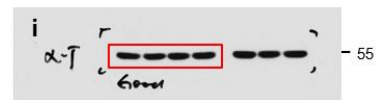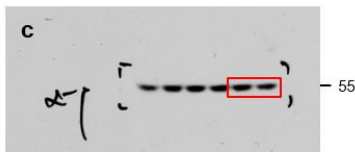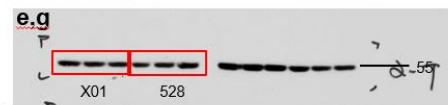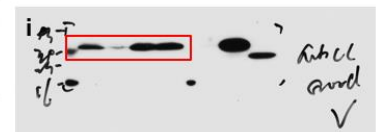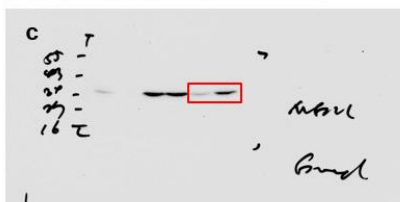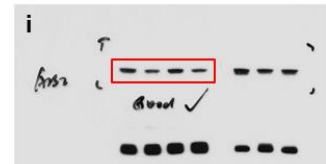

3  
4

Original immunoblot for Fig. 4a,c,e,g,i.

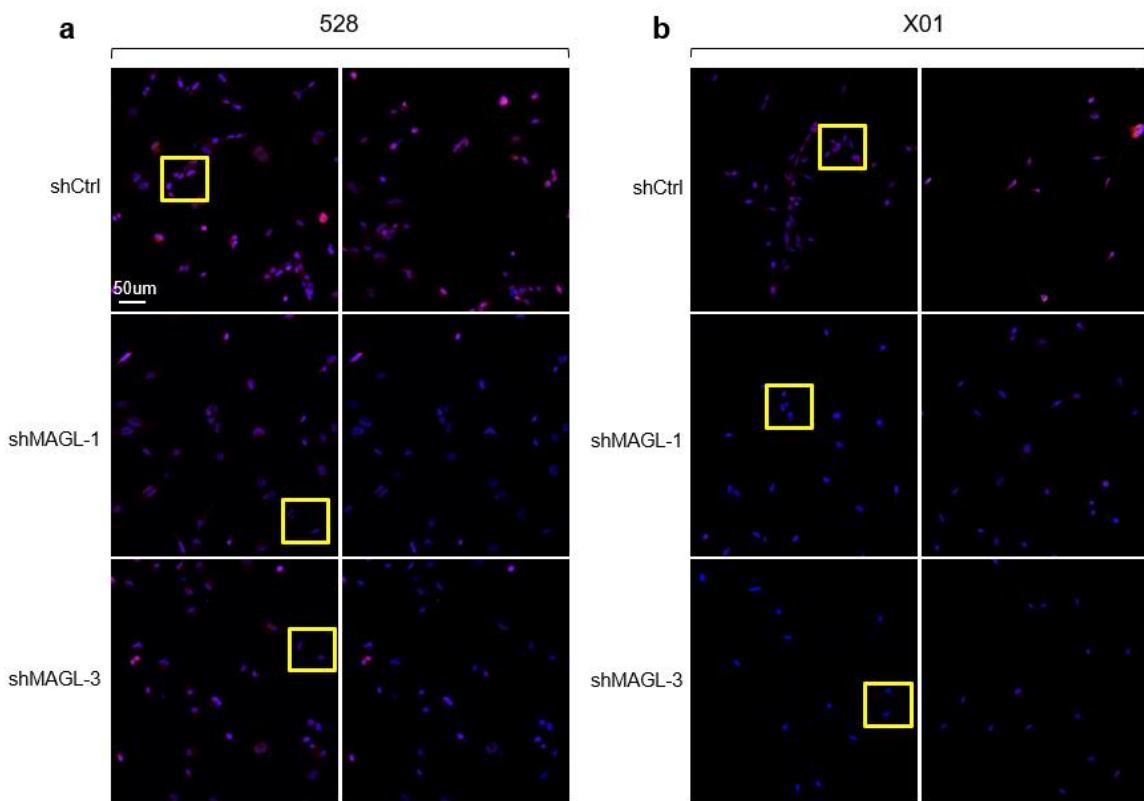

1  
2 **Original ICC staining (PGE<sub>2</sub>) for Fig. 5a,b.**

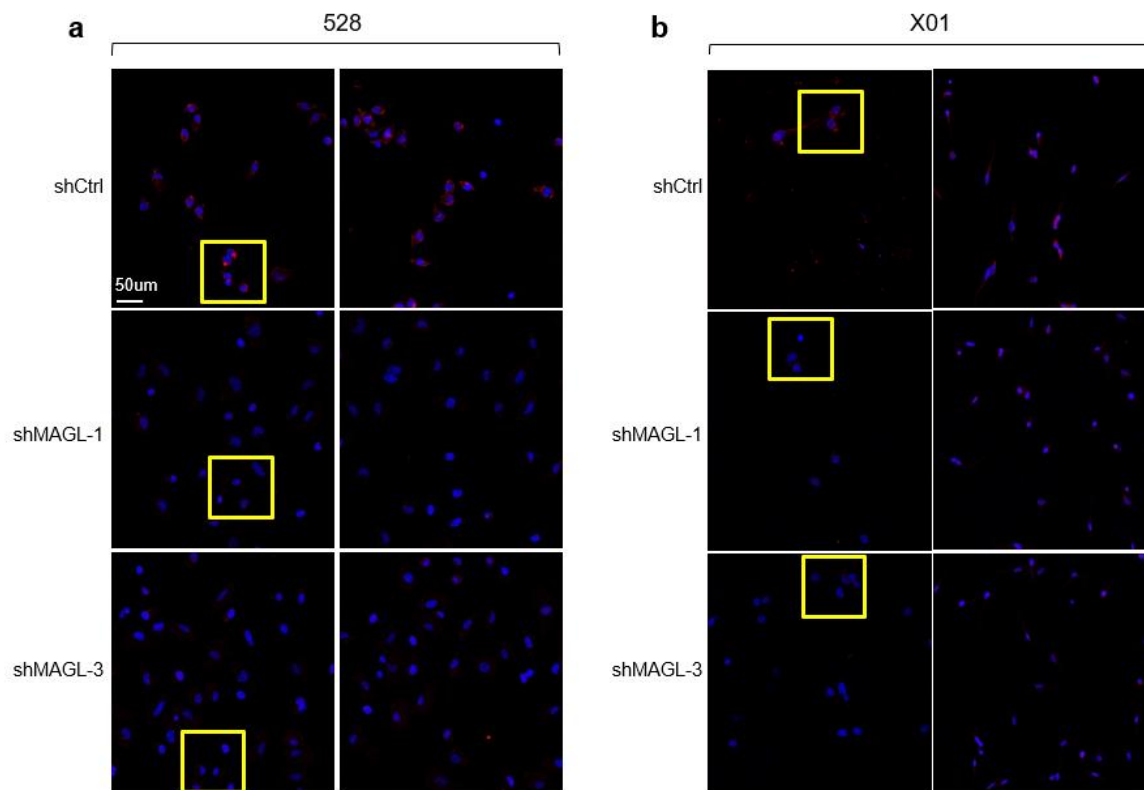

3  
4 **Original ICC staining (β-Catenin) for Fig. 5a,b.**

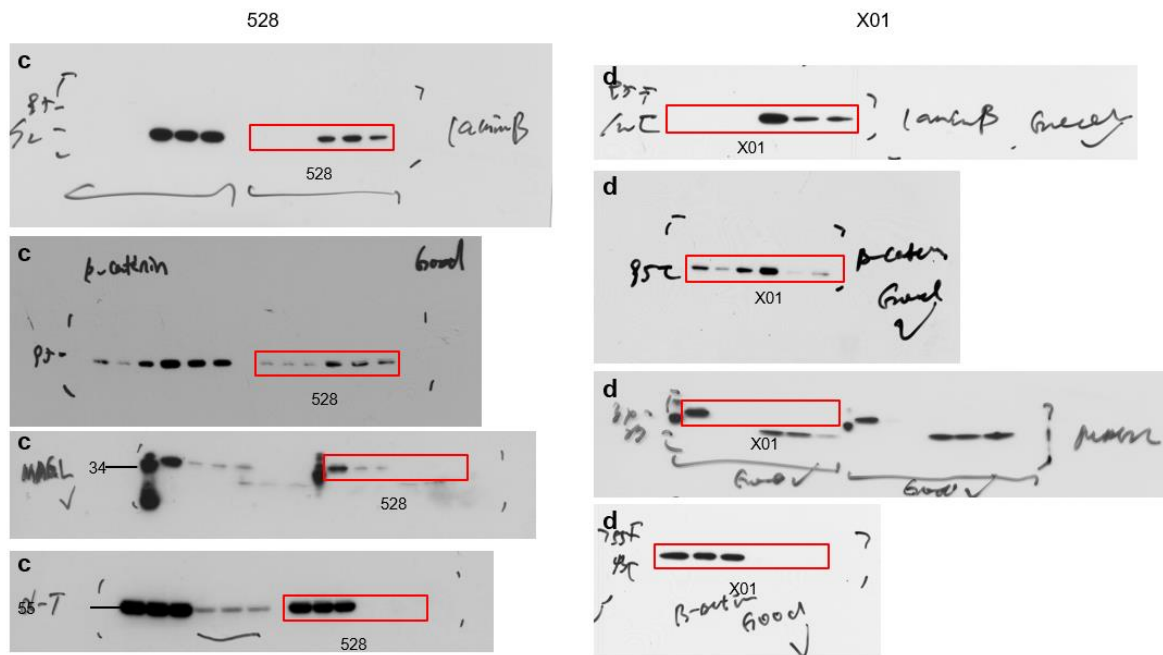

1  
2

Original immunoblot for Fig. 5c,d.

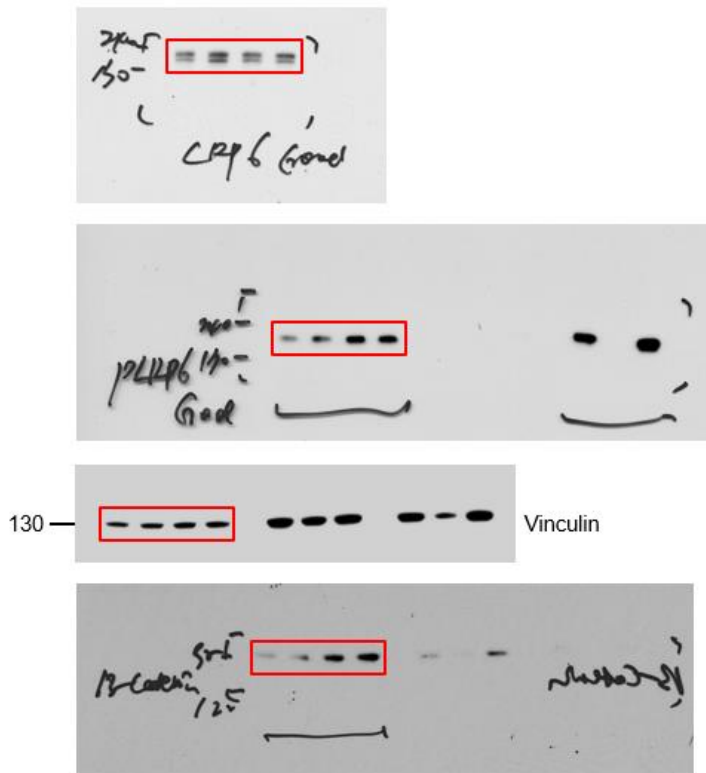

3  
4  
5

Original immunoblot for Fig. 5e.

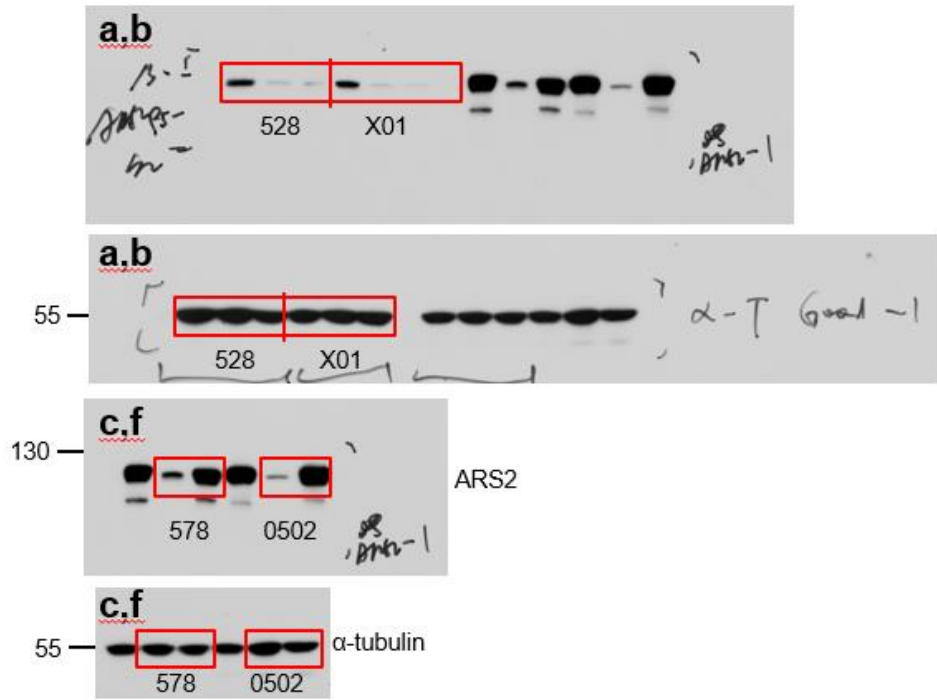

1

2 **Original immunoblot for Supplementary Fig. 2a,b,c,f.**

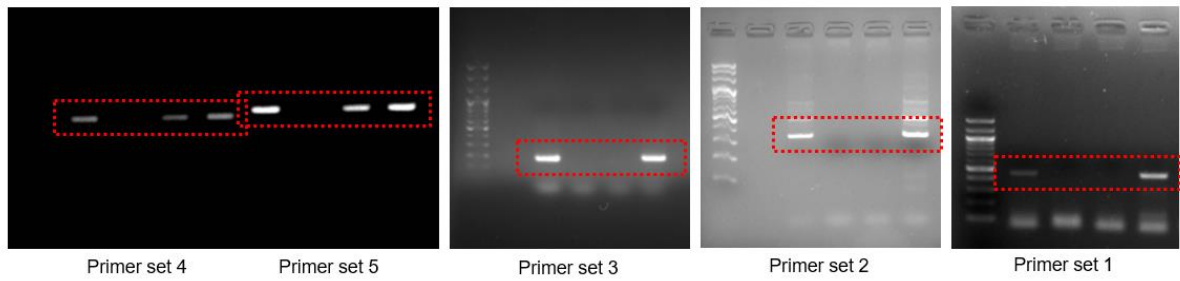

3

4 **Original RT-PCR for Supplementary Fig. 3b.**

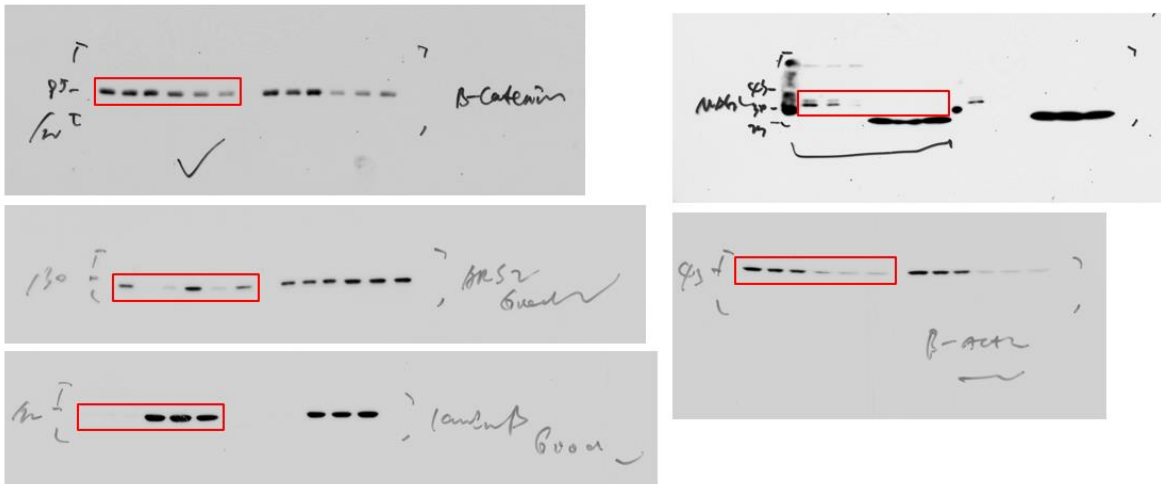

1  
2

**Original immunoblot for Supplementary Fig. 5f.**

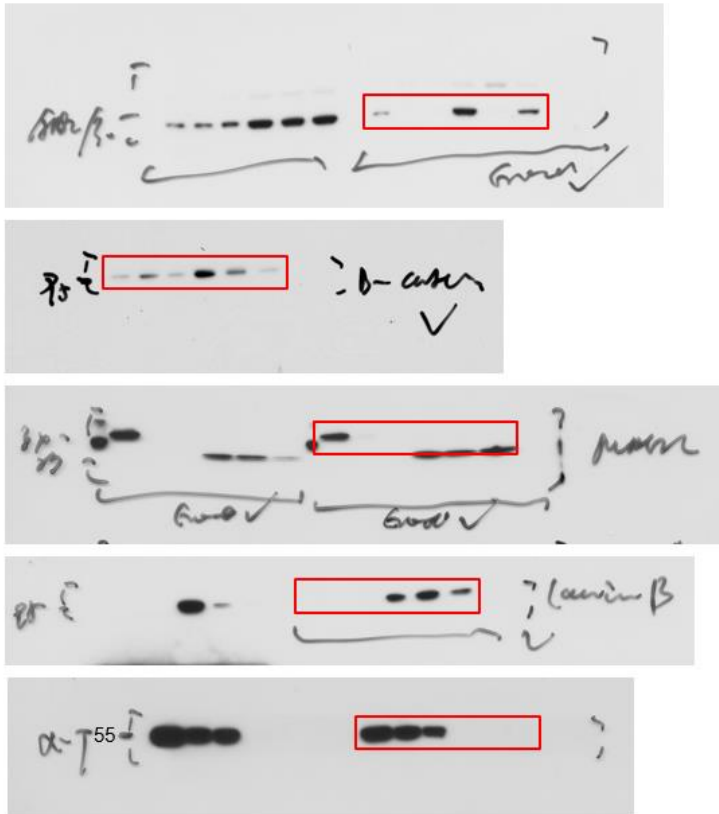

3  
4  
5  
6  
7

**Original immunoblot for Supplementary Fig. 5g.**

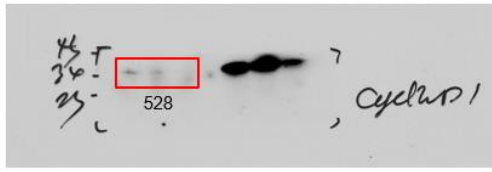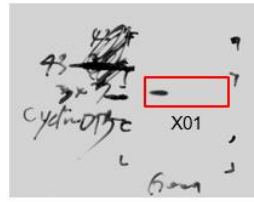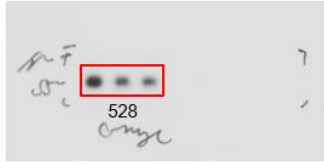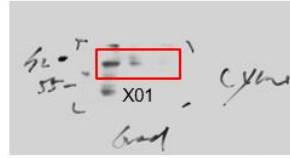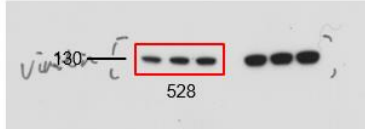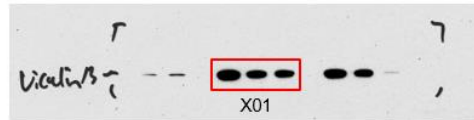

130

1  
2

**Original immunoblot for Supplementary Fig. 5i,j.**

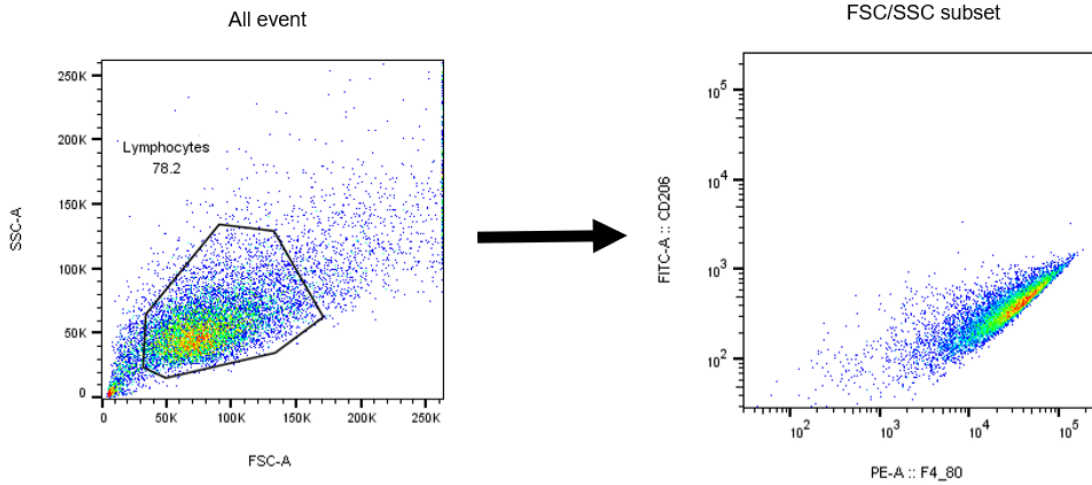

3  
4  
5

**Original FACS gating method for Supplementary Fig. 6c,d.**

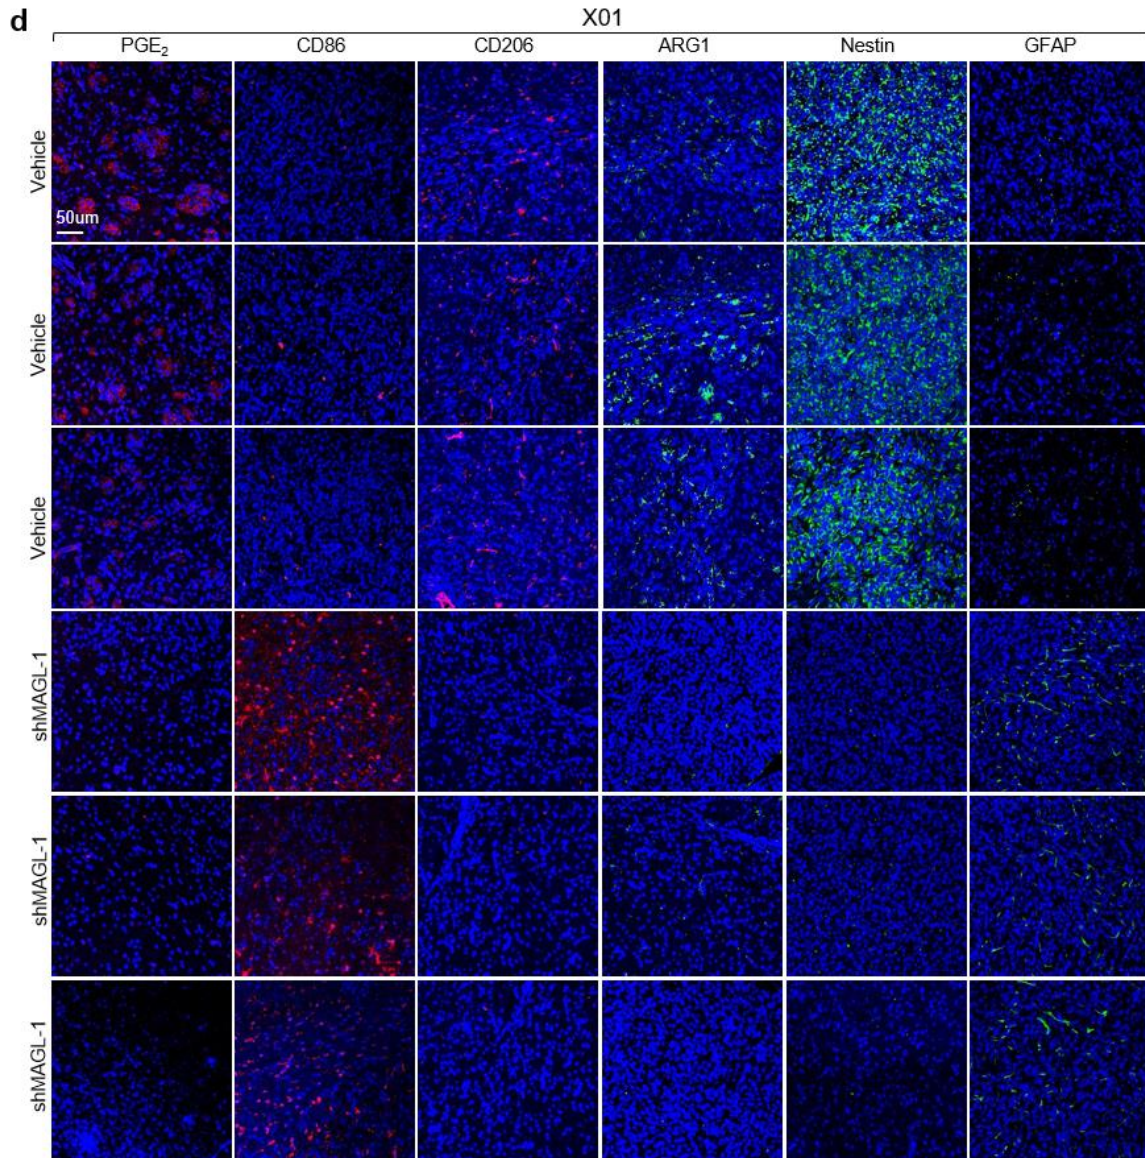

1  
2 **Original ICC staining for Fig. 6d.**

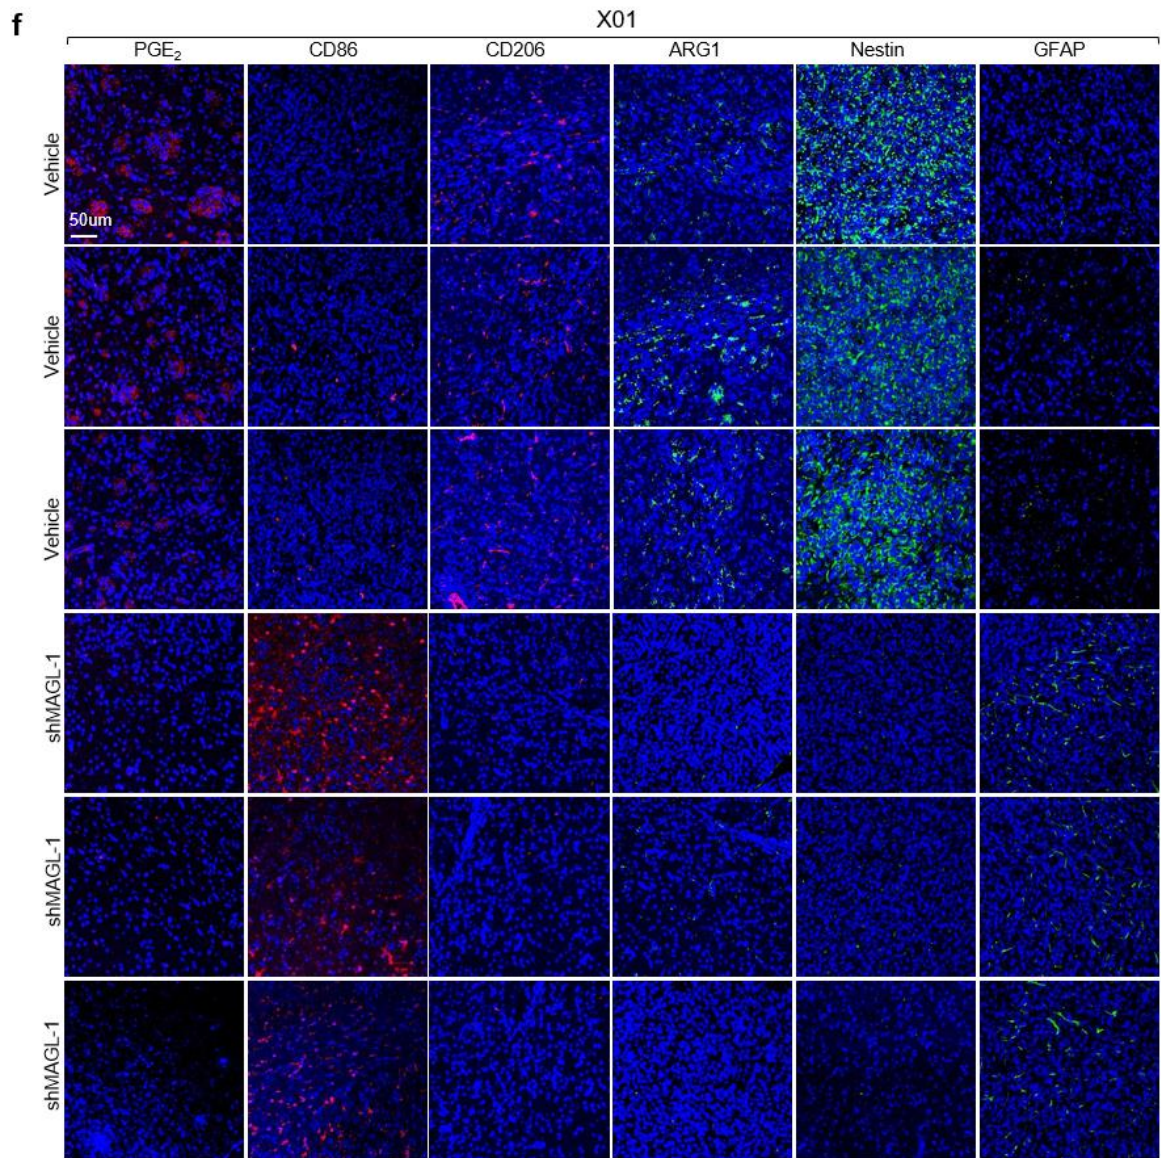

1  
2

**Original ICC staining for Fig. 6f.**



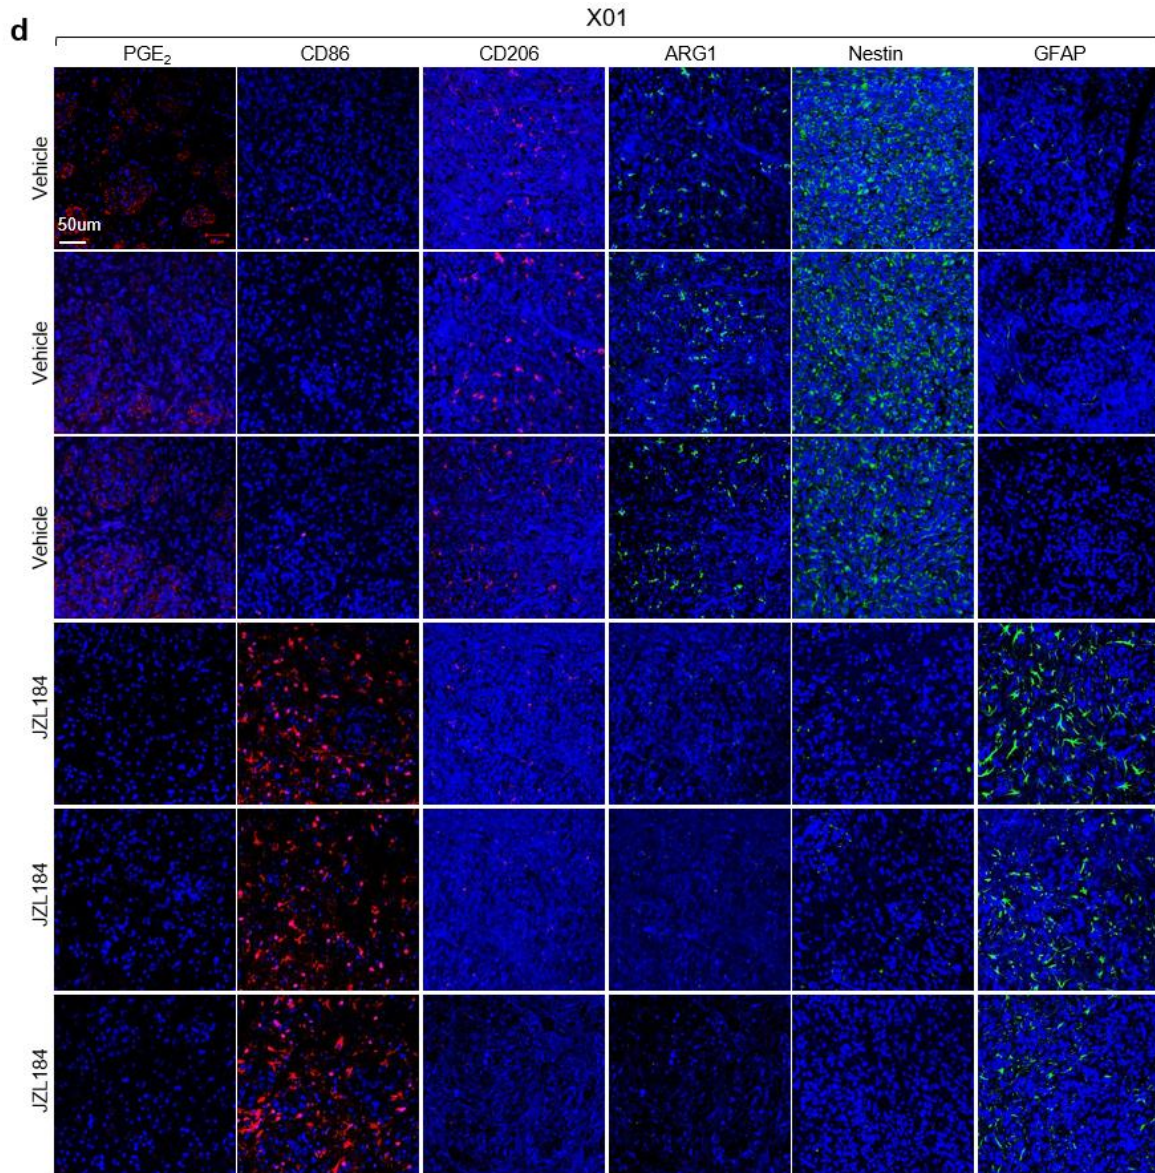

1  
2

**Original ICC staining for Fig. 7d.**

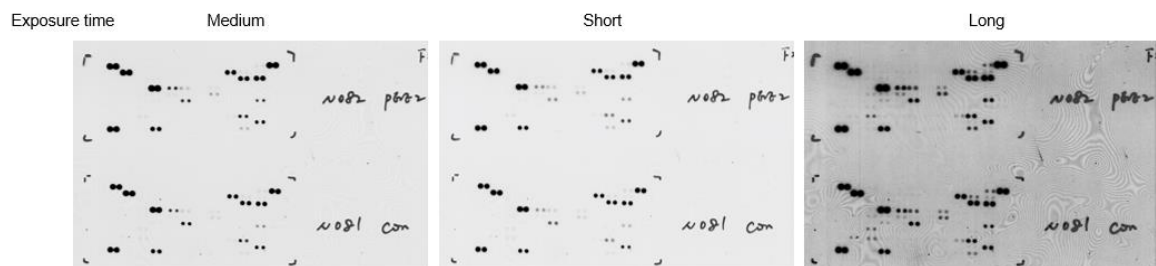

3  
4

**Original image for Supplementary Fig. 6i .**

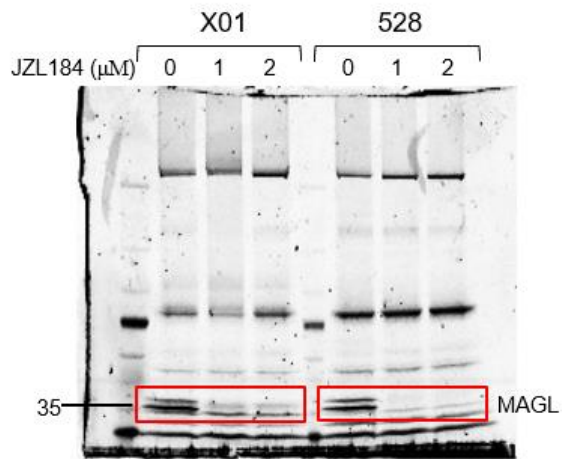

1

2 **Original gel image for Supplementary Fig. 7a.**

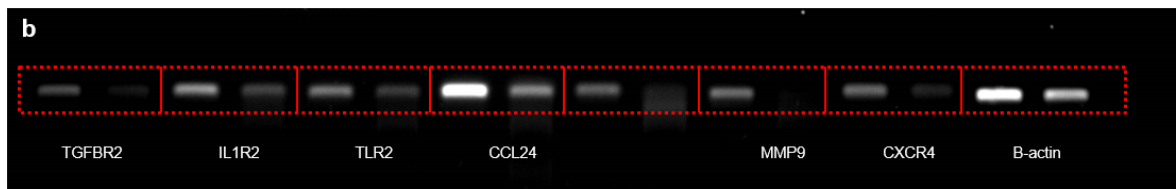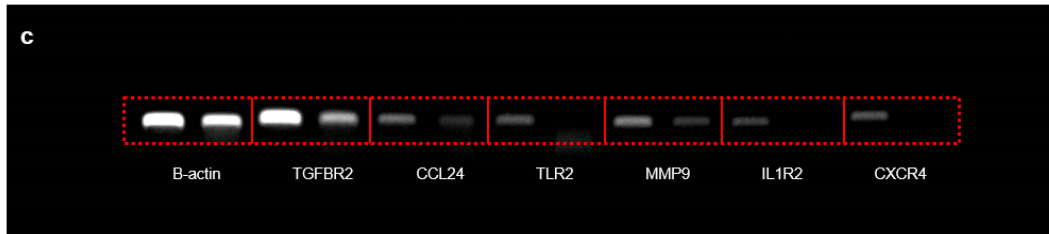

3

4 **Original RT-PCR for Supplementary Fig. 8b, c.**
